# Supplementary material
Source: PubMed Central journal article supplement (PMC6476444)
Supplement: CONC-26-e233-s001.pdf [file CONC-26-e233-s001.pdf]

## **Supplemental Materials for**

### **BTK Inhibitors for the treatment of relapsed or refractory mantle cell lymphoma**

Carolyn Owen MD, Neil L. Berinstein MD, Anna Christofides MSc RD, Laurie H. Sehn MD

#### **Listing of Supplemental Material(s):**

Supplemental Appendix 1: Key studies of BTK inhibitors in other hematological malignancies

**Supplemental Appendix 1: Key studies of BTK inhibitors in other hematological malignancies**

| Study                                | Phase | Disease                       | Treatment                                                                                                         | ORR (%) | PFS              | OS               |
|--------------------------------------|-------|-------------------------------|-------------------------------------------------------------------------------------------------------------------|---------|------------------|------------------|
| <b>Completed Studies (Phase 2/3)</b> |       |                               |                                                                                                                   |         |                  |                  |
| Byrd et al. 2013                     | Ib/II | RR CLL                        | Ibrutinib                                                                                                         | 71      | 26-month:<br>75% | 26-month:<br>83% |
| Byrd et al. 2014                     | III   | RR CLL                        | Ibrutinib                                                                                                         | 63      | 6-month:<br>88%  | 12-month:<br>90% |
| Burger et al. 2014                   | II    | RR CLL                        | Ibrutinib/Rituximab                                                                                               | 95      | 18-month:<br>78% | 18-month:<br>84% |
| Chanan-Khan et al. 2016              | III   | RR CLL                        | Ibrutinib/Bendamustine/<br>Rituximab                                                                              | 83      | 18-month:<br>79% | NR               |
| Byrd et al. 2016*                    | I/II  | RR CLL                        | Acalabrutinib                                                                                                     | 95      | 2 events         | 1 event          |
| Coutre et al. 2017                   | Ib/II | 1L CLL                        | Ibrutinib                                                                                                         | 85      | 30-month:<br>96% | 30-month:<br>96% |
| Burger et al. 2015                   | III   | 1L CLL                        | Ibrutinib                                                                                                         | 86      | 30-month:<br>90% | 24-month:<br>98% |
| Treon et al. 2015                    | II    | RR WM                         | Ibrutinib                                                                                                         | 91      | 24-month:<br>69% | 24-month:<br>95% |
| Wilson et al. 2015 <sup>†</sup>      | II    | ABC-<br>DLBCL                 | Ibrutinib                                                                                                         | 37      | 2 months         | 10 months        |
| Noy et al. 2017 <sup>‡</sup>         | II    | MZL                           | Ibrutinib                                                                                                         | 51      | 14 months        | 18-month:<br>81% |
| <b>Ongoing Phase III studies</b>     |       |                               |                                                                                                                   |         |                  |                  |
| NCT02301156                          | III   | RR High-<br>Risk CLL          | Ibrutinib + Ublituximab vs Ibrutinib                                                                              |         |                  |                  |
| NCT02477696                          | III   | RR High-<br>Risk CLL          | Acalabrutinib vs Ibrutinib                                                                                        |         |                  |                  |
| NCT02970318                          | III   | RR CLL                        | Acalabrutinib vs Idelalisib + Rituximab or Bendamustine +<br>Rituximab                                            |         |                  |                  |
| NCT03462719                          | III   | 1L CLL/SLL                    | Ibrutinib + Venetoclax vs Chlorambucil + Obinutuzumab                                                             |         |                  |                  |
| NCT02264574                          | III   | 1L CLL/SLL                    | Ibrutinib + Obinutuzumab vs Chlorambucil + Obinutuzumab                                                           |         |                  |                  |
| NCT01886872                          | III   | 1L CLL                        | Ibrutinib + Rituximab vs Ibrutinib vs Rituximab + Bendamustine                                                    |         |                  |                  |
| NCT02950051                          | III   | 1L CLL<br>without<br>del(17p) | Ibrutinib + Obinutuzumab + Venetoclax vs Standard chemo vs<br>Rituximab + Venetoclax vs Obinutuzumab + Venetoclax |         |                  |                  |
| NCT01886872                          | III   | 1L CLL<br>Older Pts           | Ibrutinib + Rituximab vs BR vs Ibrutinib                                                                          |         |                  |                  |
| NCT02048813                          | III   | 1L CLL/SLL                    | Ibrutinib + Rituximab vs FCR                                                                                      |         |                  |                  |
| NCT02475681                          | III   | 1L CLL/SLL                    | Acalabrutinib + Obinutuzumab vs Obinutuzumab + Chlorambucil vs<br>Acalabrutinib                                   |         |                  |                  |
| NCT03336333                          | III   | 1L CLL                        | Zanubrutinib vs BR                                                                                                |         |                  |                  |
| NCT03053440                          | III   | WM                            | Zanubrutinib vs Ibrutinib                                                                                         |         |                  |                  |
| NCT02972840                          | III   | 1L MCL                        | Acalabrutinib vs Bendamustine + Rituximab                                                                         |         |                  |                  |
| NCT01974440                          | III   | RR iNHL                       | Ibrutinib + BR or R-CHOP                                                                                          |         |                  |                  |

*BR, bendamustine, rituximab; CLL, chronic lymphocytic leukemia; DLBCL, diffuse large B-cell lymphoma; FCR, fludarabine, cyclophosphamide, rituximab; iNHL, indolent non-Hodgkin lymphoma; MCL, mantle cell lymphoma; MZL, marginal zone lymphoma; NR, not reached; ORR, overall response rate; OS, overall survival; PFS, progression-free survival; R-CHOP, rituximab, cyclophosphamide, vincristine, doxorubicin; prednisone; RR, relapsed or refractory; SLL, small lymphocytic lymphoma; WM, Waldenström's Macroglobulinemia*

*\*Median follow-up of 14.3 months; †Median follow-up of 10.12 months; ‡Median follow-up of 19.4 months*
